# Supplementary material for: Single-nucleus analysis of accessible chromatin in developing mouse forebrain reveals cell-type-specific transcriptional regulation
Source: Springer Nature journal article supplement (doi:10.1038/s41593-018-0079-3), 2018-02-12
Supplement: MOESM1 [file 41593_2018_79_MOESM1_ESM.pdf]

In the format provided by the authors and unedited.

# Single-nucleus analysis of accessible chromatin in developing mouse forebrain reveals cell-type-specific transcriptional regulation

Sebastian Preissl <sup>1,2,11</sup>, Rongxin Fang <sup>1,3,11</sup>, Hui Huang <sup>1,4</sup>, Yuan Zhao <sup>1,3</sup>, Ramya Raviram<sup>1</sup>,  
David U. Gorkin <sup>1,2</sup>, Yanxiao Zhang <sup>1</sup>, Brandon C. Sos<sup>4,5</sup>, Veena Afzal<sup>6</sup>, Diane E. Dickel <sup>6</sup>,  
Samantha Kuan<sup>1</sup>, Axel Visel <sup>6,7,8</sup>, Len A. Pennacchio <sup>6,7,9</sup>, Kun Zhang <sup>5</sup> and Bing Ren <sup>1,2,10\*</sup>

<sup>1</sup>Ludwig Institute for Cancer Research, La Jolla, CA, USA. <sup>2</sup>Center for Epigenomics, Department of Cellular and Molecular Medicine, University of California, San Diego, School of Medicine, La Jolla, CA, USA. <sup>3</sup>Bioinformatics and Systems Biology Graduate Program, University of California San Diego, La Jolla, CA, USA. <sup>4</sup>Biomedical Sciences Graduate Program, University of California San Diego, La Jolla, CA, USA. <sup>5</sup>Department of Bioengineering, University of California San Diego, La Jolla, CA, USA. <sup>6</sup>Environmental Genomics and Systems Biology Division, Lawrence Berkeley National Laboratory, Berkeley, CA, USA. <sup>7</sup>US Department of Energy Joint Genome Institute, Walnut Creek, CA, USA. <sup>8</sup>School of Natural Sciences, University of California Merced, Merced, CA, USA. <sup>9</sup>Comparative Biochemistry Program, University of California Berkeley, Berkeley, CA, USA. <sup>10</sup>Institute of Genomic Medicine, Moores Cancer Center, University of California San Diego, School of Medicine, La Jolla, CA, USA. <sup>11</sup>These authors contributed equally: Sebastian Preissl and Rongxin Fang. \*e-mail: [biren@ucsd.edu](mailto:biren@ucsd.edu)

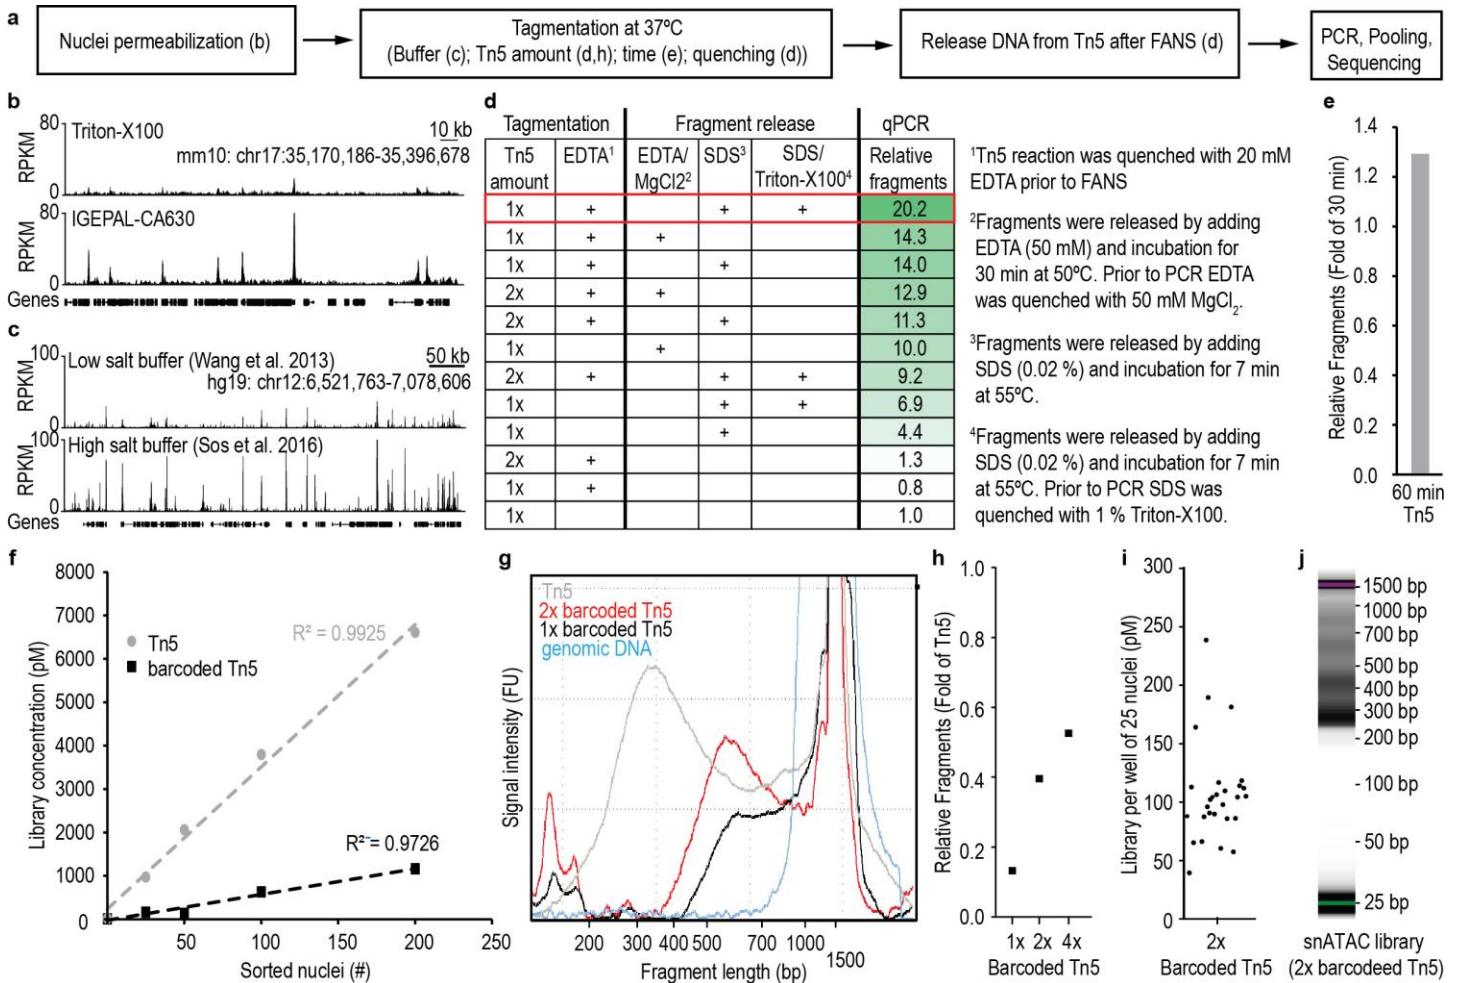

## Supplementary Figure 1

### snATAC-seq protocol optimization.

**a.** Overview of critical steps for the snATAC-seq procedure for nuclei from frozen tissues. **b.** IGEPAL-CA630 but not Triton-X100 was sufficient for tagmentation of frozen tissues ( $n = 1$  experiment). **c.** Tagmentation was facilitated by high salt concentrations in reaction buffer ( $n = 1$  experiment; Wang, Q. *et al. Nature protocols*, 2013, doi:10.1038/nprot.2013.118; Sos, B. C. *et al. Genome biology*, 2016, doi:10.1186/s13059-016-0882-7). **d.** Maximum amount of fragments per nucleus could be recovered when quenching Tn5 by EDTA prior to FANS and denaturation of Tn5 after FANS by SDS. Finally, SDS was quenched by Triton-X100 to allow efficient PCR amplification. **e.** Increasing tagmentation time from 30 min to 60 min can result in more DNA fragments per nucleus ( $n = 1$  experiment). **f.** Number of sorted nuclei was highly correlated with the final library concentration. Tn5 loaded with barcoded adapters showed less efficient tagmentation as compared to Tn5 without barcodes. Wells were amplified for 13 cycles, purified and libraries quantified by qPCR using standards with known molarity ( $n = 1$  experiment). **g.** Tagmentation with barcoded Tn5 was less efficient and resulted in larger fragments than Tn5 (550 bp vs. 300 bp). Ratio for barcoded Tn5 was based on concentration of regular Tn5. **h.** Doubling the concentration of barcoded Tn5 increased the number of fragments per nucleus by 3 fold. Further increase resulted only in minor improvements ( $n = 1$  experiment). **i.** Dot blot illustrating the amount of library from 25 nuclei per well. Each well was amplified for 11 cycles and quantified by qPCR. This output was used to calculate the number of required PCR cycles for snATAC-seq libraries to prevent overamplification ( $n = 28$  wells). **j.** Size distribution of a successful snATAC-seq library from a mixture of E15.5 forebrain and GM12878 cells shows a nucleosomal pattern. SnATAC-seq was performed including all the optimization steps described above with barcoded Tn5 in 96 well format ( $n = 1$  experiment; snATAC libraries for forebrain samples showed comparable nucleosomal patterns:  $n = 16$  experiments).
