# Supplementary material for: Single-nucleus analysis of accessible chromatin in developing mouse forebrain reveals cell-type-specific transcriptional regulation
Source: Springer Nature journal article supplement (doi:10.1038/s41593-018-0079-3), 2018-02-12
Supplement: MOESM5 [file 41593_2018_79_MOESM5_ESM.xlsx]

## Sheet: PCR Primer
i7 primer
Name	Total sequence
N701	CAAGCAGAAGACGGCATACGAGATTCGCCTTAGTCTCGTGGGCTCGG		N7..	Illumina Nextera index
N702	CAAGCAGAAGACGGCATACGAGATCTAGTACGGTCTCGTGGGCTCGG		S5..	Illumina Nextera index
N703	CAAGCAGAAGACGGCATACGAGATTTCTGCCTGTCTCGTGGGCTCGG		X..	Custom index
N704	CAAGCAGAAGACGGCATACGAGATGCTCAGGAGTCTCGTGGGCTCGG
N705	CAAGCAGAAGACGGCATACGAGATAGGAGTCCGTCTCGTGGGCTCGG
N706	CAAGCAGAAGACGGCATACGAGATCATGCCTAGTCTCGTGGGCTCGG
N707	CAAGCAGAAGACGGCATACGAGATGTAGAGAGGTCTCGTGGGCTCGG
N710	CAAGCAGAAGACGGCATACGAGATCAGCCTCGGTCTCGTGGGCTCGG
N711	CAAGCAGAAGACGGCATACGAGATTGCCTCTTGTCTCGTGGGCTCGG
N712	CAAGCAGAAGACGGCATACGAGATTCCTCTACGTCTCGTGGGCTCGG
N714	CAAGCAGAAGACGGCATACGAGATTCATGAGCGTCTCGTGGGCTCGG
N715	CAAGCAGAAGACGGCATACGAGATCCTGAGATGTCTCGTGGGCTCGG
N716	CAAGCAGAAGACGGCATACGAGATTAGCGAGTGTCTCGTGGGCTCGG
N718	CAAGCAGAAGACGGCATACGAGATGTAGCTCCGTCTCGTGGGCTCGG
N719	CAAGCAGAAGACGGCATACGAGATTACTACGCGTCTCGTGGGCTCGG
N721	CAAGCAGAAGACGGCATACGAGATGCAGCGTAGTCTCGTGGGCTCGG
N722	CAAGCAGAAGACGGCATACGAGATCTGCGCATGTCTCGTGGGCTCGG
N723	CAAGCAGAAGACGGCATACGAGATGAGCGCTAGTCTCGTGGGCTCGG
N724	CAAGCAGAAGACGGCATACGAGATCGCTCAGTGTCTCGTGGGCTCGG
N726	CAAGCAGAAGACGGCATACGAGATGTCTTAGGGTCTCGTGGGCTCGG
N727	CAAGCAGAAGACGGCATACGAGATACTGATCGGTCTCGTGGGCTCGG
N728	CAAGCAGAAGACGGCATACGAGATTAGCTGCAGTCTCGTGGGCTCGG
N729	CAAGCAGAAGACGGCATACGAGATGACGTCGAGTCTCGTGGGCTCGG
X730	CAAGCAGAAGACGGCATACGAGATTACCAGAGGTCTCGTGGGCTCGG
X731	CAAGCAGAAGACGGCATACGAGATGGATGGAAGTCTCGTGGGCTCGG
X732	CAAGCAGAAGACGGCATACGAGATATTGAGGCGTCTCGTGGGCTCGG
X733	CAAGCAGAAGACGGCATACGAGATCGGATAGAGTCTCGTGGGCTCGG
X734	CAAGCAGAAGACGGCATACGAGATTGGTAGACGTCTCGTGGGCTCGG
X735	CAAGCAGAAGACGGCATACGAGATACCTGGTTGTCTCGTGGGCTCGG
X736	CAAGCAGAAGACGGCATACGAGATCAGTTCTGGTCTCGTGGGCTCGG
X737	CAAGCAGAAGACGGCATACGAGATTCGAACGTGTCTCGTGGGCTCGG
X738	CAAGCAGAAGACGGCATACGAGATCGTTGCTTGTCTCGTGGGCTCGG
X739	CAAGCAGAAGACGGCATACGAGATTACCGTTCGTCTCGTGGGCTCGG
X740	CAAGCAGAAGACGGCATACGAGATTAGGTTGCGTCTCGTGGGCTCGG
X741	CAAGCAGAAGACGGCATACGAGATGAGGCTAAGTCTCGTGGGCTCGG
X742	CAAGCAGAAGACGGCATACGAGATCGACCATAGTCTCGTGGGCTCGG
X743	CAAGCAGAAGACGGCATACGAGATAGGCAGTAGTCTCGTGGGCTCGG
X744	CAAGCAGAAGACGGCATACGAGATATCAAGCGGTCTCGTGGGCTCGG
X745	CAAGCAGAAGACGGCATACGAGATCATTGAAGGTCTCGTGGGCTCGG
X746	CAAGCAGAAGACGGCATACGAGATCGACTTATGTCTCGTGGGCTCGG
X747	CAAGCAGAAGACGGCATACGAGATTCTATACGGTCTCGTGGGCTCGG
X748	CAAGCAGAAGACGGCATACGAGATAGCATTAGGTCTCGTGGGCTCGG
X749	CAAGCAGAAGACGGCATACGAGATAATTGGCAGTCTCGTGGGCTCGG
X750	CAAGCAGAAGACGGCATACGAGATAGATTCGTGTCTCGTGGGCTCGG
X751	CAAGCAGAAGACGGCATACGAGATTTCATGACGTCTCGTGGGCTCGG
X752	CAAGCAGAAGACGGCATACGAGATTGAACTTGGTCTCGTGGGCTCGG
X753	CAAGCAGAAGACGGCATACGAGATATGGCATAGTCTCGTGGGCTCGG
X754	CAAGCAGAAGACGGCATACGAGATCGTAATTCGTCTCGTGGGCTCGG
X755_spike-in	CAAGCAGAAGACGGCATACGAGATCTAAGAACCAGAGCACCCGAGCC
i5 primer
Name	Total sequence
S502	AATGATACGGCGACCACCGAGATCTACACCTCTCTATTCGTCGGCAGCGTC
S503	AATGATACGGCGACCACCGAGATCTACACTATCCTCTTCGTCGGCAGCGTC
S505	AATGATACGGCGACCACCGAGATCTACACGTAAGGAGTCGTCGGCAGCGTC
S506	AATGATACGGCGACCACCGAGATCTACACACTGCATATCGTCGGCAGCGTC
S507	AATGATACGGCGACCACCGAGATCTACACAAGGAGTATCGTCGGCAGCGTC
S508	AATGATACGGCGACCACCGAGATCTACACCTAAGCCTTCGTCGGCAGCGTC
S510	AATGATACGGCGACCACCGAGATCTACACCGTCTAATTCGTCGGCAGCGTC
S511	AATGATACGGCGACCACCGAGATCTACACTCTCTCCGTCGTCGGCAGCGTC
X512	AATGATACGGCGACCACCGAGATCTACACTCGACTAGTCGTCGGCAGCGTC
X513	AATGATACGGCGACCACCGAGATCTACACTTCTAGCTTCGTCGGCAGCGTC
X514	AATGATACGGCGACCACCGAGATCTACACCCTAGAGTTCGTCGGCAGCGTC
X515	AATGATACGGCGACCACCGAGATCTACACGCGTAAGATCGTCGGCAGCGTC
X516	AATGATACGGCGACCACCGAGATCTACACAAGGCTATTCGTCGGCAGCGTC
X517	AATGATACGGCGACCACCGAGATCTACACGAGCCTTATCGTCGGCAGCGTC
X518	AATGATACGGCGACCACCGAGATCTACACTTATGCGATCGTCGGCAGCGTC
X519	AATGATACGGCGACCACCGAGATCTACACATCTGAGTTCGTCGGCAGCGTC
X520	AATGATACGGCGACCACCGAGATCTACACGGATACTATCGTCGGCAGCGTC
X521	AATGATACGGCGACCACCGAGATCTACACTAAGATCCTCGTCGGCAGCGTC
X522	AATGATACGGCGACCACCGAGATCTACACAAGAGATGTCGTCGGCAGCGTC
X523	AATGATACGGCGACCACCGAGATCTACACAATGACGTTCGTCGGCAGCGTC
X524	AATGATACGGCGACCACCGAGATCTACACGAAGTATGTCGTCGGCAGCGTC
X525	AATGATACGGCGACCACCGAGATCTACACATAGCCTTTCGTCGGCAGCGTC
X526	AATGATACGGCGACCACCGAGATCTACACTTGGAAGTTCGTCGGCAGCGTC
X527	AATGATACGGCGACCACCGAGATCTACACATTCGTTGTCGTCGGCAGCGTC
X528	AATGATACGGCGACCACCGAGATCTACACAGGATAACTCGTCGGCAGCGTC
X529	AATGATACGGCGACCACCGAGATCTACACTTCATCCATCGTCGGCAGCGTC
X530	AATGATACGGCGACCACCGAGATCTACACAACGAACGTCGTCGGCAGCGTC
X531	AATGATACGGCGACCACCGAGATCTACACTGCCTTACTCGTCGGCAGCGTC
X532	AATGATACGGCGACCACCGAGATCTACACCGAATTCCTCGTCGGCAGCGTC
X533	AATGATACGGCGACCACCGAGATCTACACGGTTAGACTCGTCGGCAGCGTC
X534	AATGATACGGCGACCACCGAGATCTACACTCCGGTAATCGTCGGCAGCGTC
X535	AATGATACGGCGACCACCGAGATCTACACTTACGACCTCGTCGGCAGCGTC
X536_spike-in	AATGATACGGCGACCACCGAGATCTACACTCCTACGGAGCAGCCGTCGCAG

## Sheet: Tagmentation Oligos
Name	Sequence
p5_1	TCGTCGGCAGCGTCTCCACGCTATAGCCTGCGATCGAGGACGGCAGATGTGTATAAGAGACAG
p5_2	TCGTCGGCAGCGTCTCCACGCATAGAGGCGCGATCGAGGACGGCAGATGTGTATAAGAGACAG
p5_3	TCGTCGGCAGCGTCTCCACGCCCTATCCTGCGATCGAGGACGGCAGATGTGTATAAGAGACAG
p5_4	TCGTCGGCAGCGTCTCCACGCGGCTCTGAGCGATCGAGGACGGCAGATGTGTATAAGAGACAG
p5_5	TCGTCGGCAGCGTCTCCACGCAGGCGAAGGCGATCGAGGACGGCAGATGTGTATAAGAGACAG
p5_6	TCGTCGGCAGCGTCTCCACGCTAATCTTAGCGATCGAGGACGGCAGATGTGTATAAGAGACAG
p5_7	TCGTCGGCAGCGTCTCCACGCCAGGACGTGCGATCGAGGACGGCAGATGTGTATAAGAGACAG
p5_8	TCGTCGGCAGCGTCTCCACGCGTACTGACGCGATCGAGGACGGCAGATGTGTATAAGAGACAG
p5_spike-in	AGCAGCCGTCGCAGAGGTGCGTATAGCCTGCGATCGAGGACGGCAGATGTGTATAAGAGACAG
p7_1	GTCTCGTGGGCTCGGCTGTCCCTGTCCCGAGTAATCACCGTCTCCGCCTCAGATGTGTATAAGAGACAG
p7_2	GTCTCGTGGGCTCGGCTGTCCCTGTCCTCTCCGGACACCGTCTCCGCCTCAGATGTGTATAAGAGACAG
p7_3	GTCTCGTGGGCTCGGCTGTCCCTGTCCAATGAGCGCACCGTCTCCGCCTCAGATGTGTATAAGAGACAG
p7_4	GTCTCGTGGGCTCGGCTGTCCCTGTCCGGAATCTCCACCGTCTCCGCCTCAGATGTGTATAAGAGACAG
p7_5	GTCTCGTGGGCTCGGCTGTCCCTGTCCTTCTGAATCACCGTCTCCGCCTCAGATGTGTATAAGAGACAG
p7_6	GTCTCGTGGGCTCGGCTGTCCCTGTCCACGAATTCCACCGTCTCCGCCTCAGATGTGTATAAGAGACAG
p7_7	GTCTCGTGGGCTCGGCTGTCCCTGTCCAGCTTCAGCACCGTCTCCGCCTCAGATGTGTATAAGAGACAG
p7_8	GTCTCGTGGGCTCGGCTGTCCCTGTCCGCGCATTACACCGTCTCCGCCTCAGATGTGTATAAGAGACAG
p7_9	GTCTCGTGGGCTCGGCTGTCCCTGTCCCATAGCCGCACCGTCTCCGCCTCAGATGTGTATAAGAGACAG
p7_10	GTCTCGTGGGCTCGGCTGTCCCTGTCCTTCGCGGACACCGTCTCCGCCTCAGATGTGTATAAGAGACAG
p7_11	GTCTCGTGGGCTCGGCTGTCCCTGTCCGCGCGAGACACCGTCTCCGCCTCAGATGTGTATAAGAGACAG
p7_12	GTCTCGTGGGCTCGGCTGTCCCTGTCCCTATCGCTCACCGTCTCCGCCTCAGATGTGTATAAGAGACAG
p7_spike-in	CAGAGCACCCGAGCCGACAGGGACAGGCGAGTAATCACCGTCTCCGCCTCAGATGTGTATAAGAGACAG
pMENTS	5Phos/CTGTCTCTTATACACATCT
Read 1 Sequencing Primer	GCGATCGAGGACGGCAGATGTGTATAAGAGACAG
Read 2 Sequencing Primer	CACCGTCTCCGCCTCAGATGTGTATAAGAGACAG
Index 1 Sequencing Primer	CTGTCTCTTATACACATCTGAGGCGGAGACGGTG
Oligo-sequences (except "spike-in") from Amini et al., Nat. Genet., 2014
